# Supplementary material for: Determination of Cytotoxic Activity of Sanguinaria canadensis Extracts against Human Melanoma Cells and Comparison of Their Cytotoxicity with Cytotoxicity of Some Anticancer Drugs
Source: PubMed Central journal article supplement (PMC8003779; doi:10.3390/molecules26061738), 2021-03-20
Supplement: molecules-26-01738-s001.pdf [file molecules-26-01738-s001.pdf]

**Table S1.** Equation of calibration curve, correlation coefficients (r), limit of detection (LOD) and limit of quantification (LOQ) values.

| Alkaloid      | $t_R$ (min) | Equation of calibration curve | r      | LOD [mg/mL] | LOQ [mg/mL] |
|---------------|-------------|-------------------------------|--------|-------------|-------------|
| Berberine     | 35.48       | $y = 70984852x - 3300769$     | 0.9990 | 0.0128      | 0.0422      |
| Chelerythrine | 42.57       | $y = 57154058x + 12978$       | 0.9989 | 0.0086      | 0.0260      |
| Chelidonine   | 19.33       | $y = 16505788x - 35518$       | 0.9991 | 0.0111      | 0.0336      |
| Protopine     | 14.18       | $y = 525340599x + 98298$      | 0.9983 | 0.0222      | 0.0673      |
| Sanguinarine  | 36.82       | $y = 63958474x + 118255$      | 0.9994 | 0.0060      | 0.0182      |

**Table S2.** MS parameters and conditions used for determination and identification of selected alkaloids in plant samples.

| Compound      | Elemental composition                    | $t_R$ (min) | Polarity | Theoretical ( $m/z$ ) | Measured ( $m/z$ ) | Major fragment ions                                      | Error (ppm) | ID Score [%] | Collision energy (eV) | Fragmentor |
|---------------|------------------------------------------|-------------|----------|-----------------------|--------------------|----------------------------------------------------------|-------------|--------------|-----------------------|------------|
| Berberine     | $C_{20}H_{18}NO_4$<br>[M+H] <sup>+</sup> | 3.12        | ESI+     | 335.7426              | 335.7429           | 319.7029<br>305.6823<br>304.1893<br>291.6987<br>277.6827 | -0.41       | 99.18        | 20                    | 195        |
| Chelerythrine | $C_{21}H_{18}NO_4$<br>[M+H] <sup>+</sup> | 3.98        | ESI+     | 347.7491              | 347.7489           | 331.7071<br>303.6990<br>274.6920<br>231.6968             | 1.19        | 99.56        | 20                    | 195        |
| Chelidonine   | $C_{20}H_{20}NO_5$<br>[M+H] <sup>+</sup> | 1.94        | ESI+     | 354.3922              | 354.3920           | 336.6503<br>303.6990<br>274.6920<br>189.4355             | -1.17       | 99.90        | 20                    | 195        |
| Protopine     | $C_{20}H_{20}NO_5$<br>[M+H] <sup>+</sup> | 1.68        | ESI+     | 353.7653              | 353.7655           | 336.1209<br>274.6716<br>205.7380<br>188.7681<br>148.8711 | -0.93       | 99.15        | 20                    | 195        |
| Sanguinarine  | $C_{20}H_{14}NO_4$<br>[M+H] <sup>+</sup> | 2.75        | ESI+     | 331.7068              | 331.7065           | 316.6761<br>303.6993<br>288.6723<br>273.6853<br>245.7012 | 1.26        | 99.34        | 20                    | 195        |

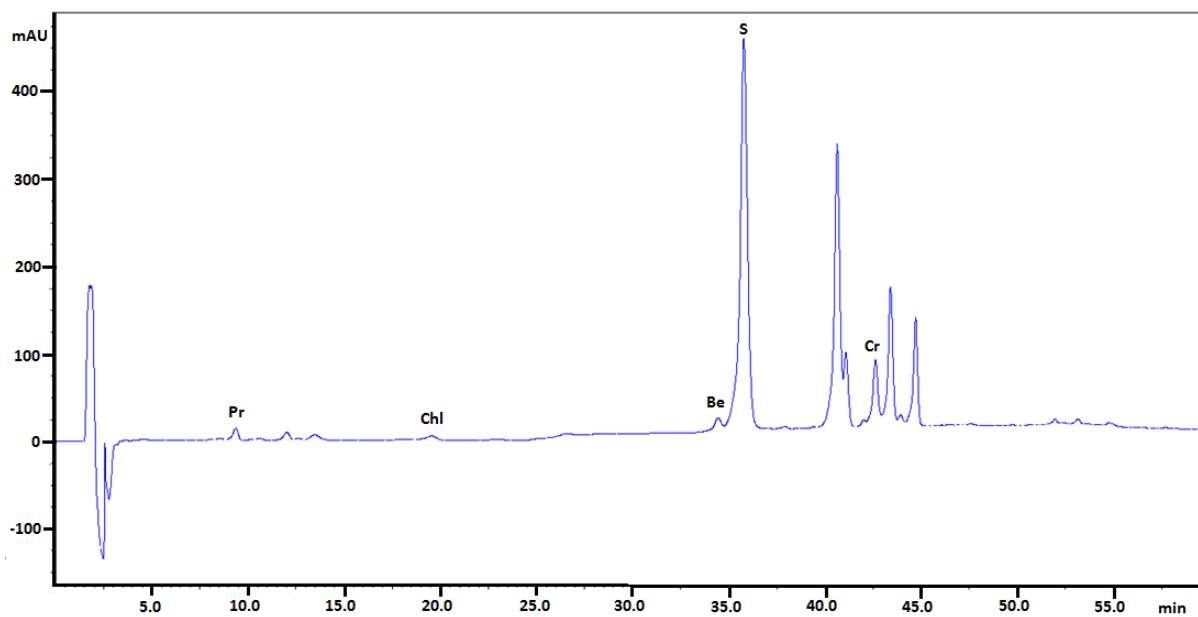

**Figure S1.** Chromatogram obtained from *Sanguinaria canadensis* extract collected before flowering. Be: Berberine; Cr: Chelerythrine; Chld: Chelidonium; Pr: Protopine; S: Sanguinarine.

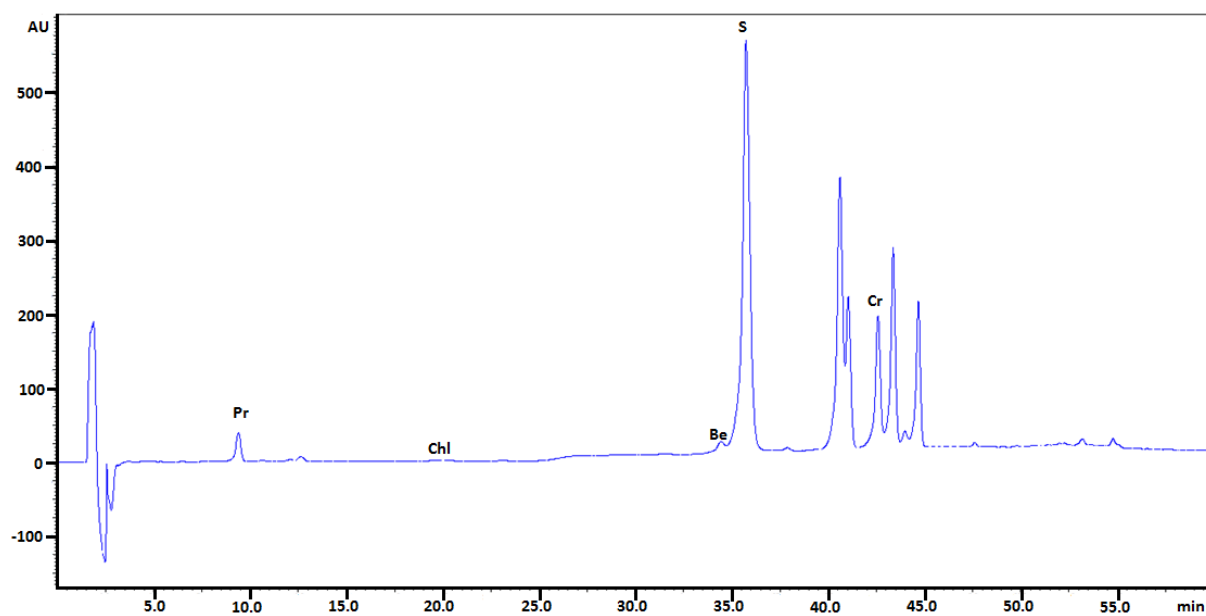

**Figure S2.** Chromatogram obtained from *Sanguinaria canadensis* extract collected after flowering. Be: Berberine; Cr: Chelerythrine; Chld: Chelidonium; Pr: Protopine; S: Sanguinarine

a)

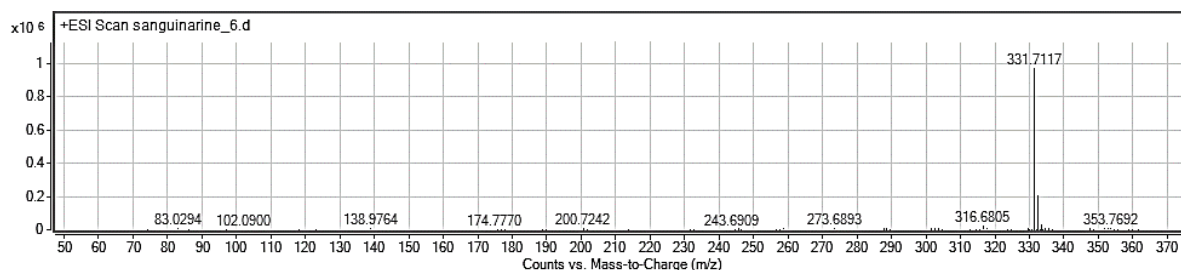

b)

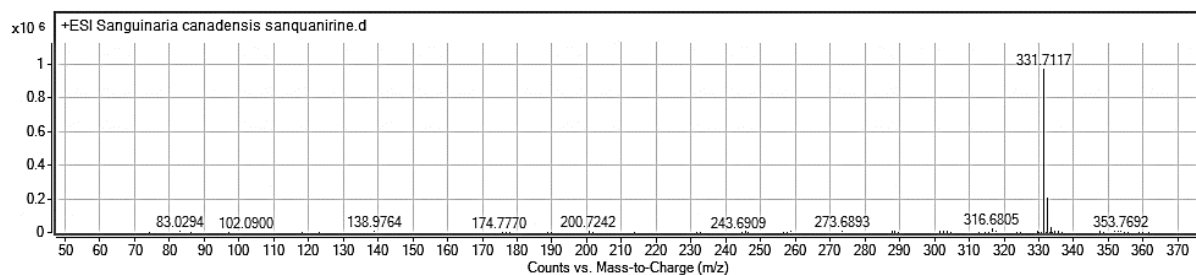

c)

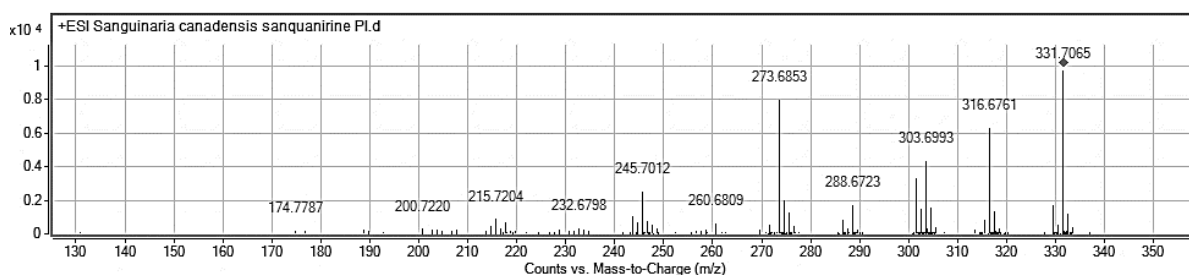

**Figure S3.** MS spectrum obtained for a) standard of sanguinarine, b) sanguinarine from *Sanguinaria canadensis* collected during flowering extract, c) MS/MS spectrum of sanguinarine from *Sanguinaria canadensis* collected during flowering extract. *Experimental conditions:* mobile phase composition: 0.1% HCOOH (A), ACN (B) 70:30 (v/v), flow rate: 0.6 mL/min, autosampler temperature 20°C, drying gas flow rate 7.0 L/min; shielding gas flow rate 5.0 L/min; nebulizer gas pressure 40 psi; skimmer voltage 50 V, octopole voltage 800 V; capillary voltage 3500 V; drying gas temperature 295°C; shielding gas temperature 315°C; fragmentor voltage 195 V; CID energy in both MS and MS/MS were 5 and 20 eV.
